# Supplementary material for: The Association between Vessel Departures and Air Pollution in Helsinki Port Area 2016–2021
Source: MDPI journal article supplement (doi:10.3390/atmos14040757), 2023-04-21
Supplement: s1 [file s1]

# Supplementary Materials: The Association between Vessel Departures and Air Pollution in Helsinki Port Area 2016–2021

Mikko Heikkilä \* and Jukka-Pekka Jalkanen

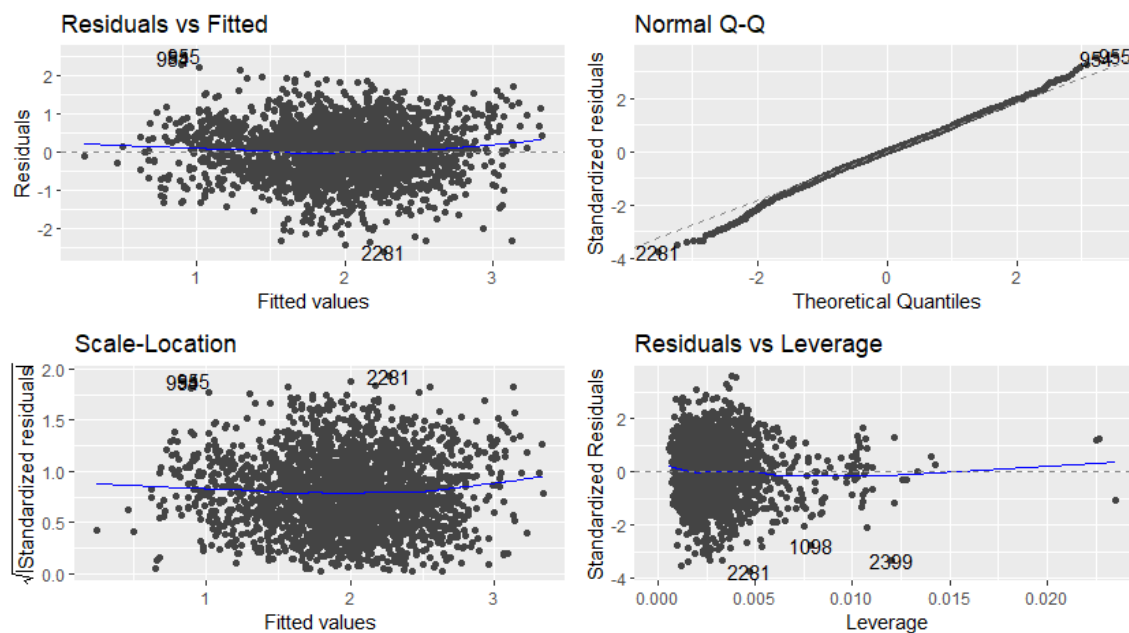

**Figure S1.** Diagnostic plots of the residuals and fitted values of the multivariable linear regression for log NO<sub>2</sub> and vessel departures at Vuosaari weekends in 2016.

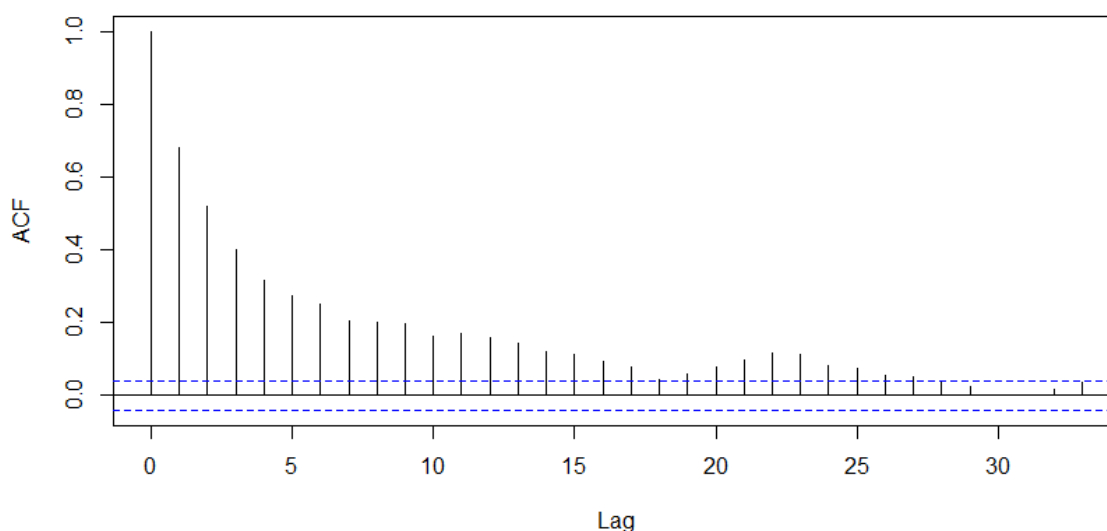

**Figure S2.** Autocorrelation function of the multivariable linear regression for log NO<sub>2</sub> and vessel departures at Vuosaari weekends in 2016.

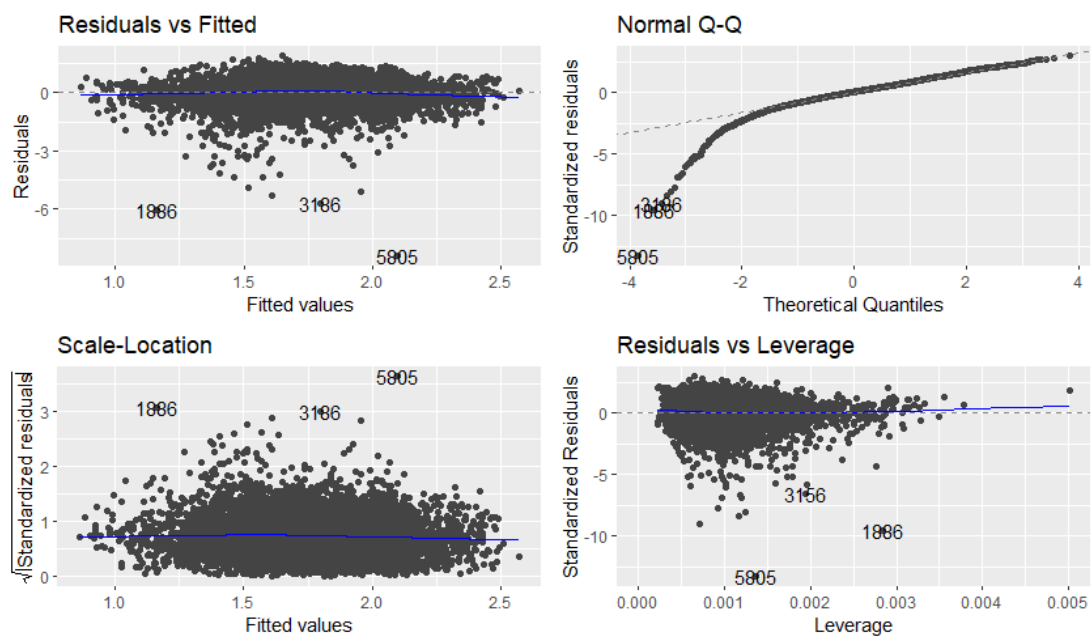

**Figure S3.** Diagnostic plots of the residuals and fitted values of the multivariable linear regression for log  $PM_{2.5}$  and vessels at berth.

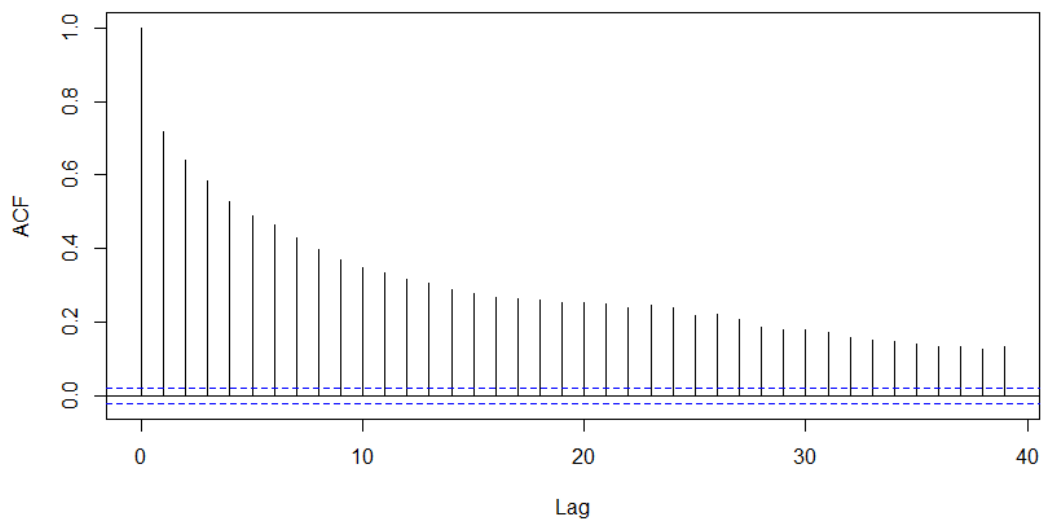

**Figure S4.** Autocorrelation function plot of the model collinearity of the multivariable linear regression for log  $PM_{2.5}$  and vessels at berth.

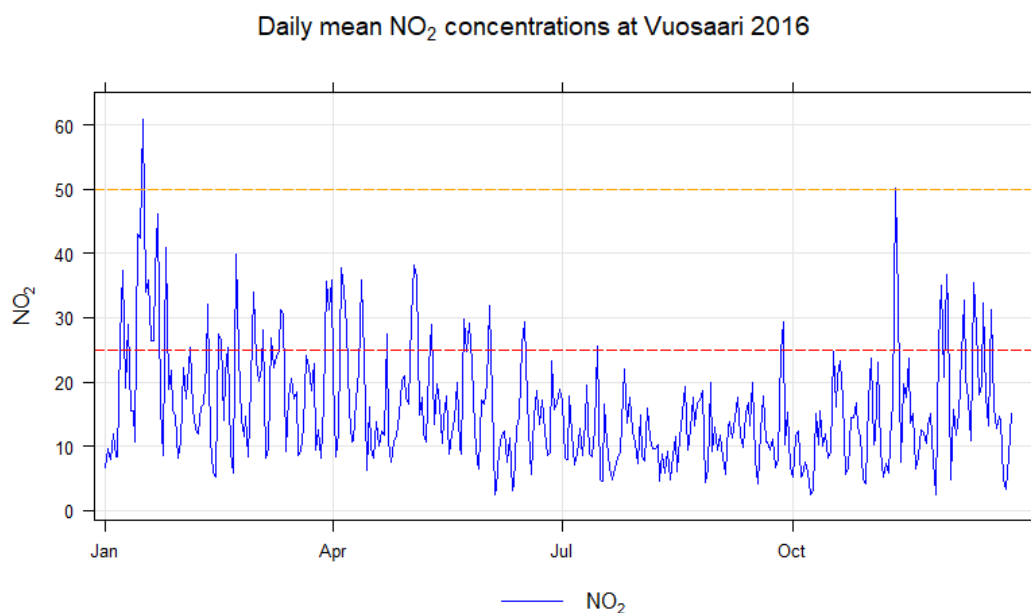

**Figure S5.** Time series plot of daily mean concentration of NO<sub>2</sub> in Vuosaari in 2016. Red dashed line is the WHO 2021 guideline value (25 µg/m<sup>3</sup>) and the orange line the EU Commission proposal (50 µg/m<sup>3</sup>).

**Polarplot of NO<sub>2</sub> concentration (µg m<sup>-3</sup>) Vuosaari 2016**

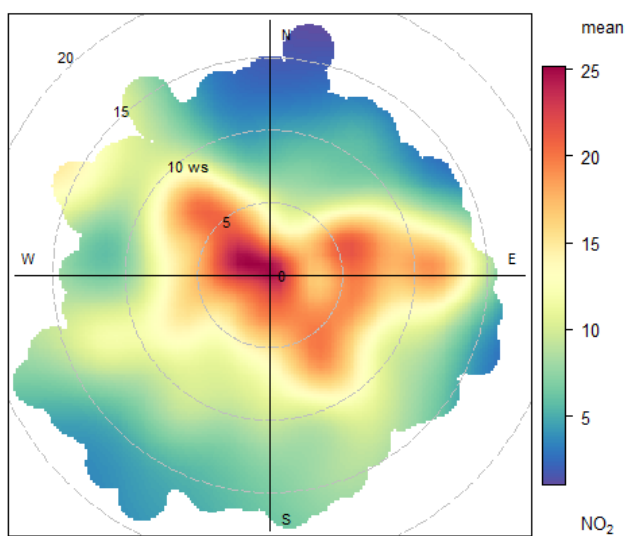

**Figure S6.** Polarplot of NO<sub>2</sub> hourly mean concentration by wind speed and direction at the Vuosaari port terminal in 2016.

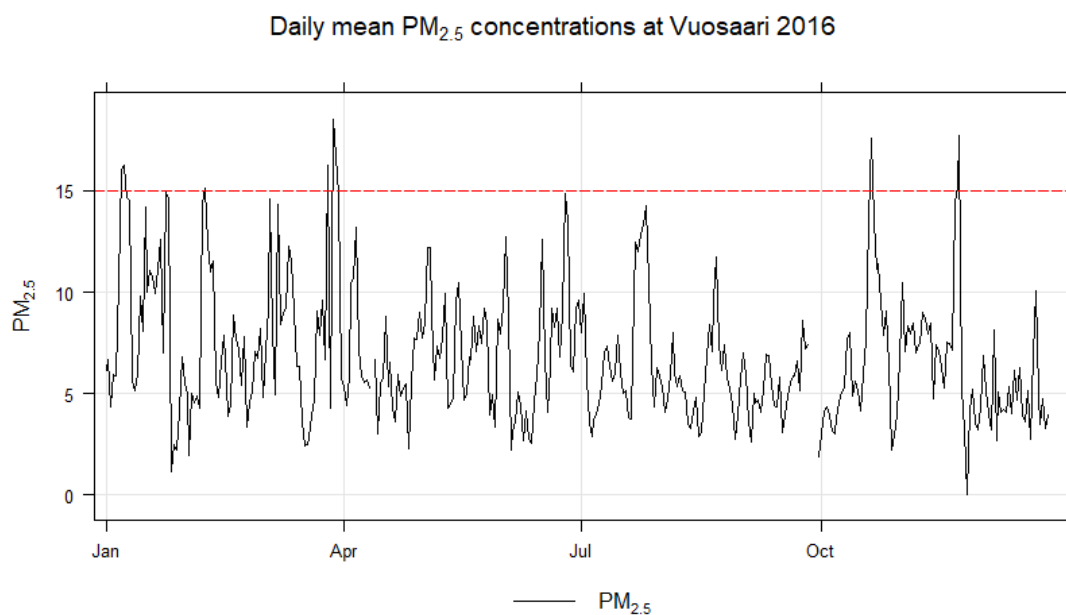

**Figure S7.** Time series plot of daily mean concentration of  $PM_{2.5}$  in Vuosaari in 2016. Red dashed line is the WHO 2021 guideline value ( $15 \mu\text{g}/\text{m}^3$ ).

**Polarplot of  $PM_{2.5}$  concentration ( $\mu\text{g m}^{-3}$ ) Vuosaari 2016**

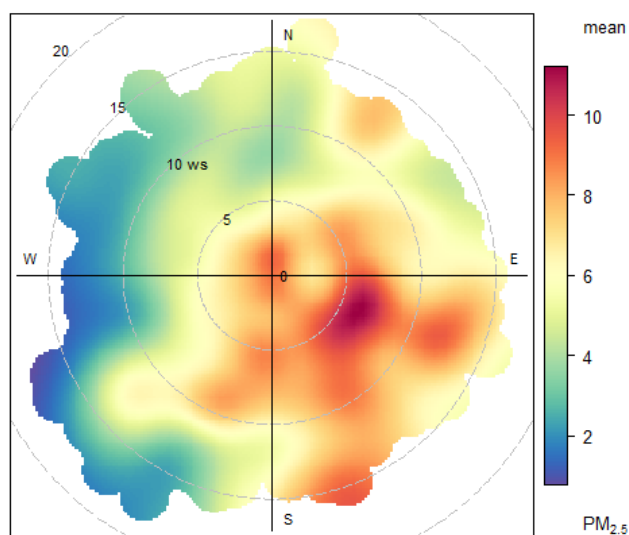

**Figure S8.** Polarplot of  $PM_{2.5}$  concentration by wind speed and direction at Vuosaari in 2016.

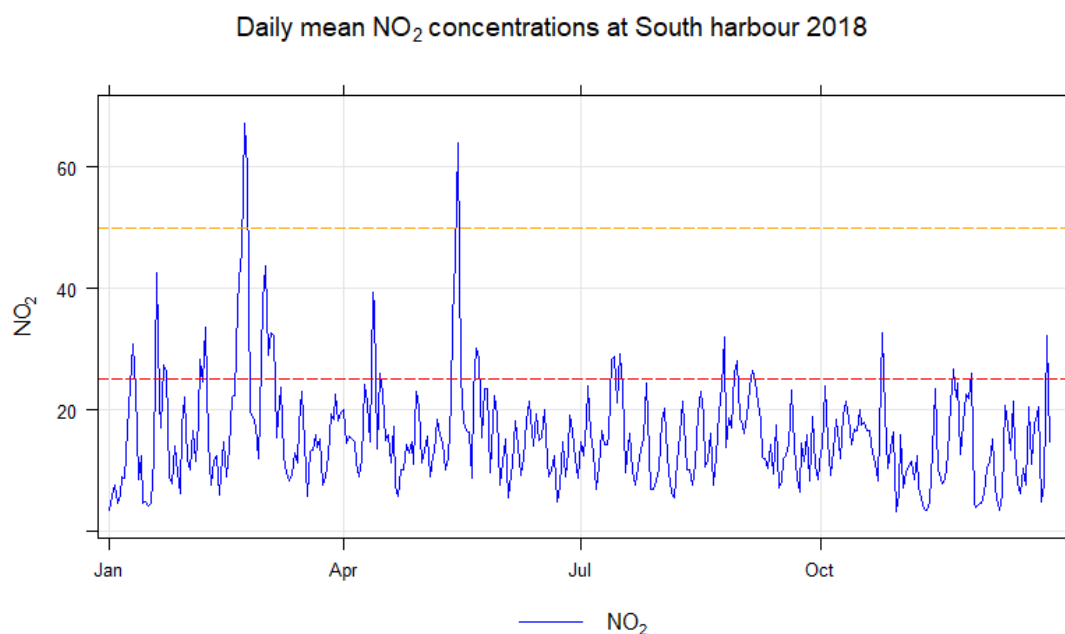

**Figure S9.** Time series plot of daily mean NO<sub>2</sub> at South Harbour in 2018. Red dashed line is the WHO 2021 guideline value (25  $\mu\text{g}/\text{m}^3$ ) and the orange dashed line the EU Commission proposal (50  $\mu\text{g}/\text{m}^3$ ).

**Polarplot of NO<sub>2</sub> concentration ( $\mu\text{g m}^{-3}$ ) South harbor 2018**

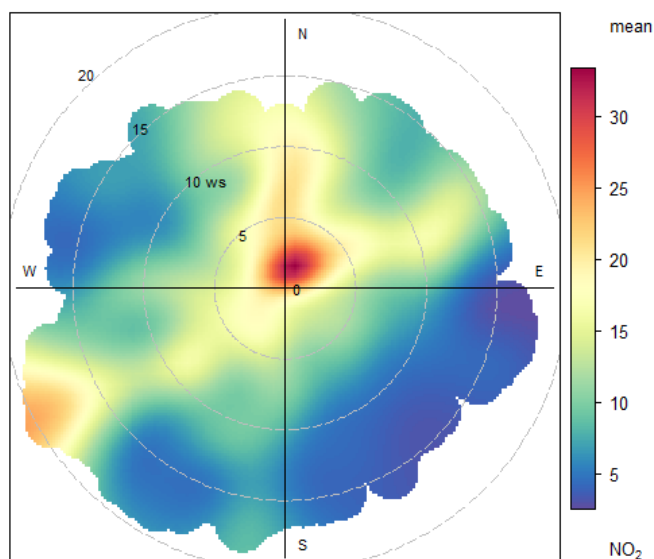

**Figure S10.** Polarplot of NO<sub>2</sub> concentration by wind speed and direction at South Harbour in 2018.

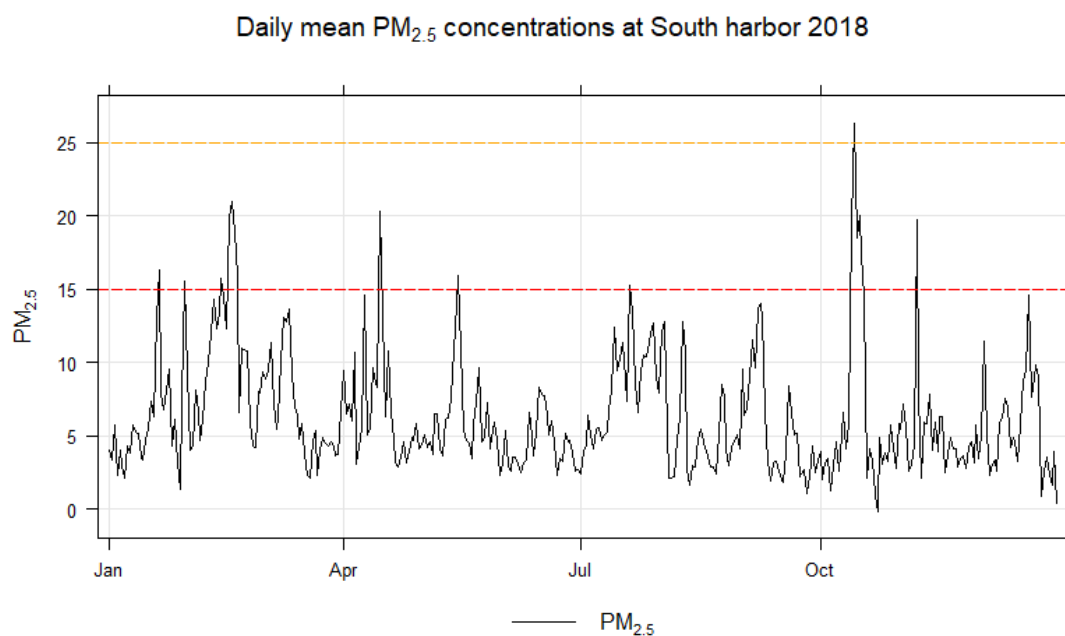

**Figure S11.** Time series of daily mean  $PM_{2.5}$  at South Harbour in 2018. Red dashed line is the WHO 2021 guideline value ( $15 \mu\text{g}/\text{m}^3$ ) and the orange dashed line the European Commission proposal ( $25 \mu\text{g}/\text{m}^3$ ).

**Polarplot of  $PM_{2.5}$  concentration ( $\mu\text{g m}^{-3}$ ) South harbor 2018**

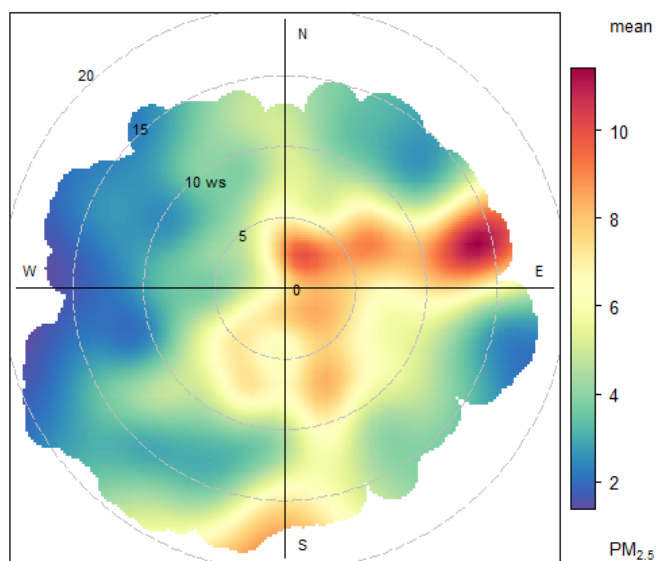

**Figure S12.** Polarplot of  $PM_{2.5}$  concentration by wind speed and direction at South Harbour in 2018.

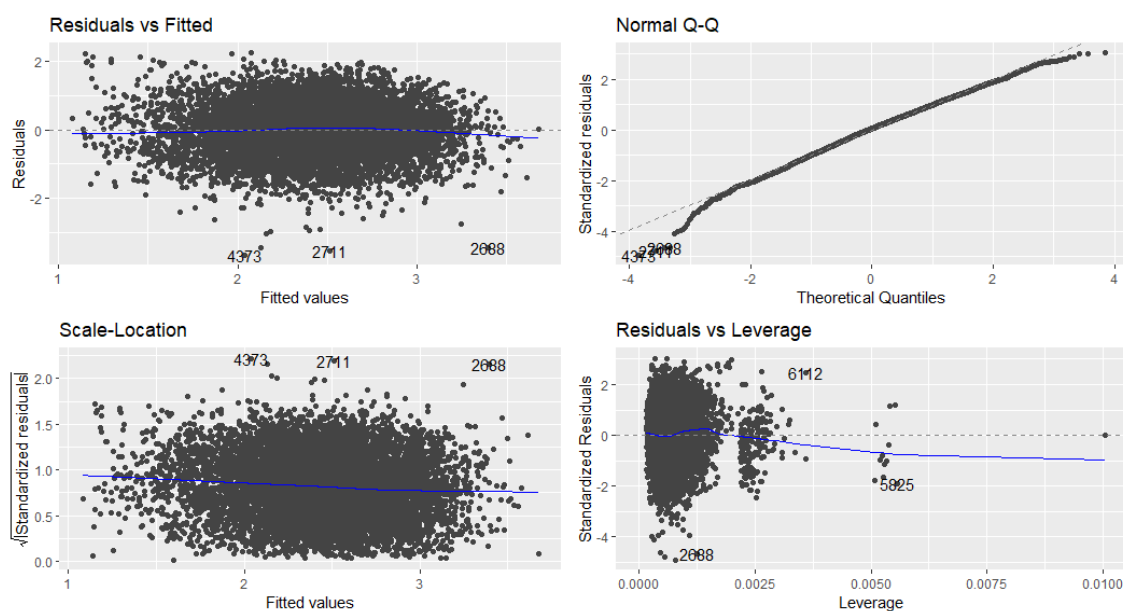

**Figure S13.** Diagnostic plots of the model residuals for departures and log NO<sub>2</sub> at South Harbour in 2018.

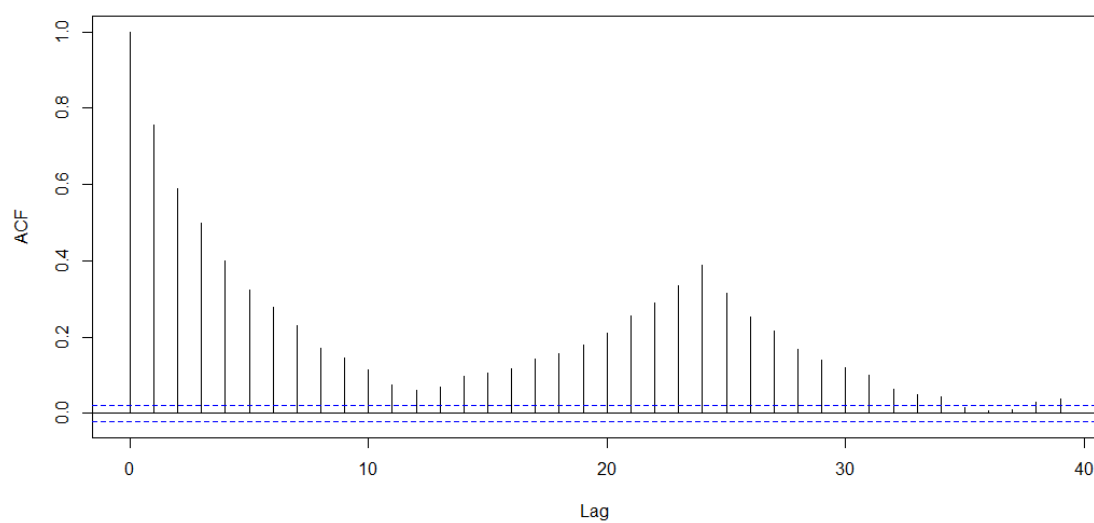

**Figure S14.** Autocorrelation function plot of the model residuals for departures and log NO<sub>2</sub> at South Harbour in 2018.

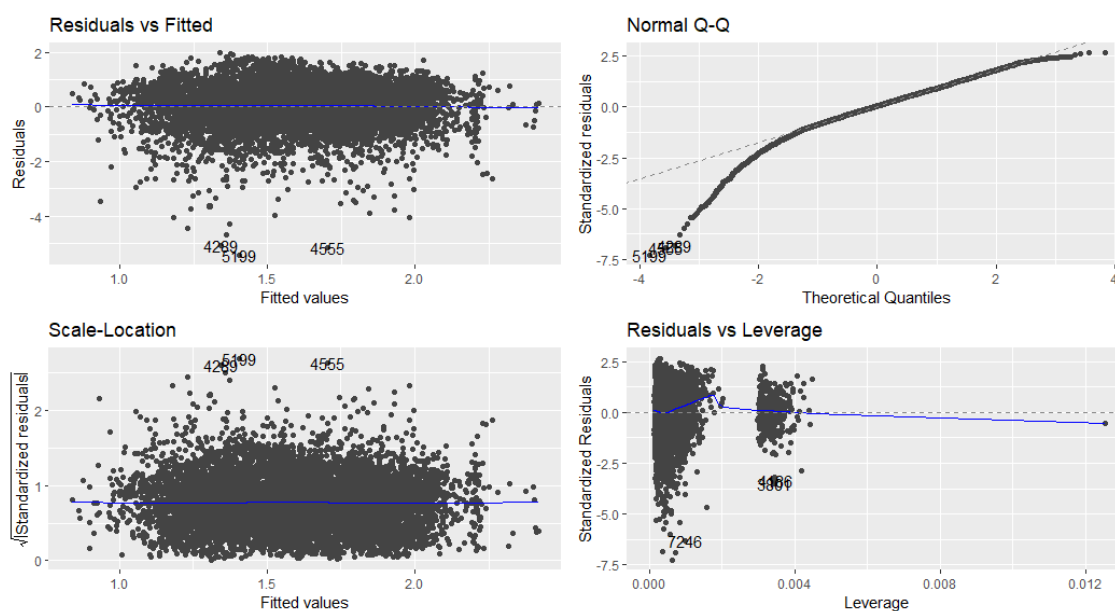

**Figure S15.** Diagnostic plots of the model residuals for arrivals to the Olympia quay at South Harbour in 2018 and log PM<sub>2.5</sub>.

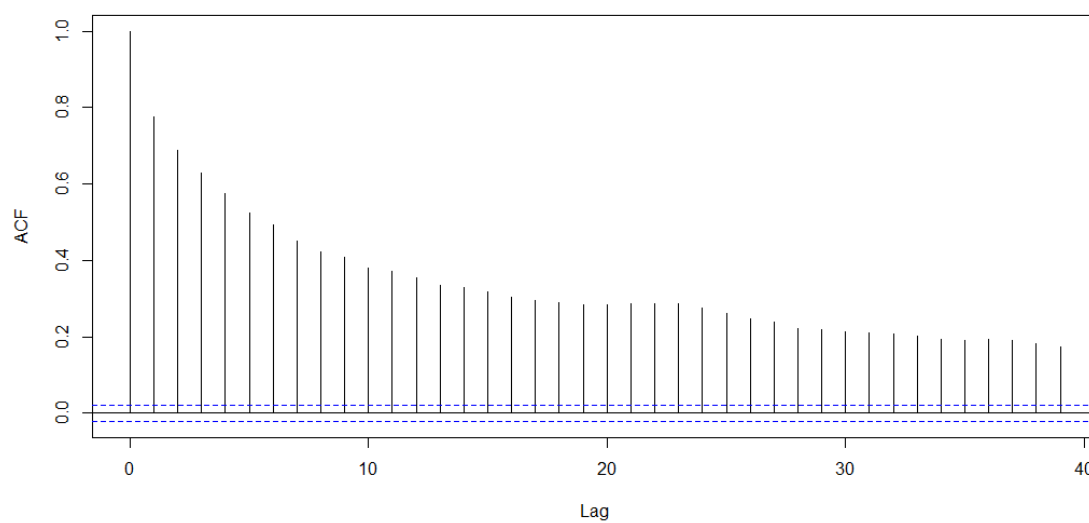

**Figure S16.** Autocorrelation function plot of the model residuals for arrivals to the Olympia quay at South Harbour in 2018 and log PM<sub>2.5</sub>.



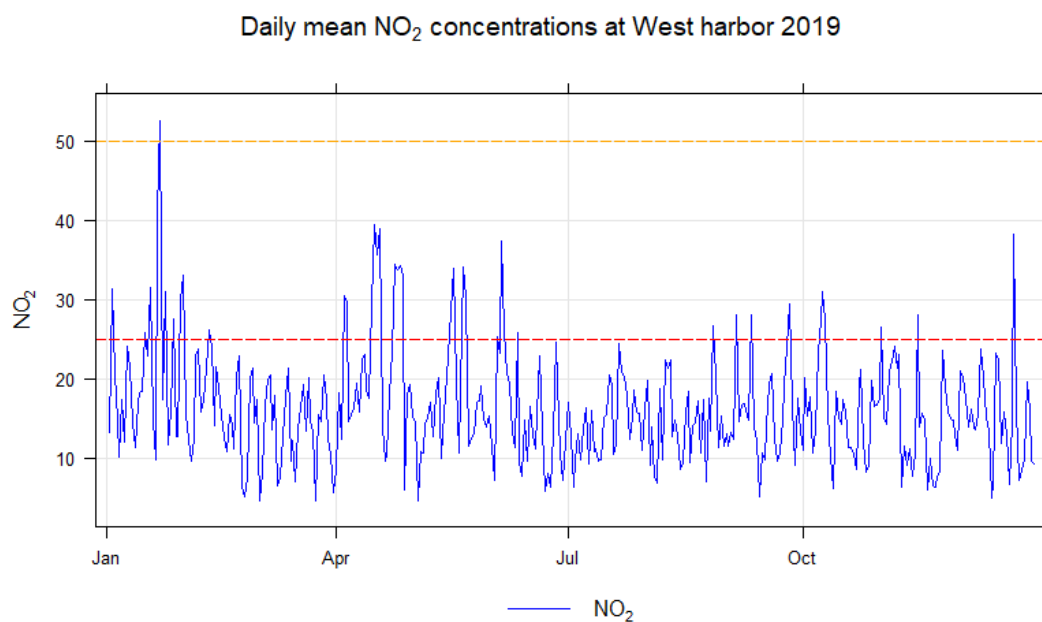

**Figure S17.** Time series of daily mean NO<sub>2</sub> concentration at West Harbour in 2019. Red dashed line is the WHO 2021 guideline value (25  $\mu\text{g}/\text{m}^3$ ) and the orange line the European Commission proposal (50  $\mu\text{g}/\text{m}^3$ ).

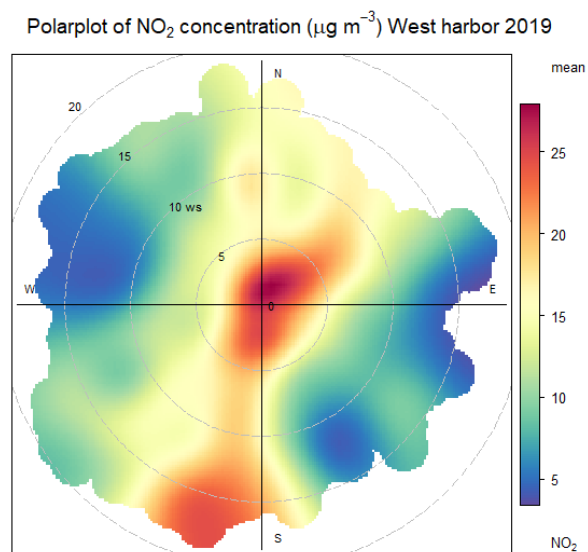

**Figure S18.** Polarplot of NO<sub>2</sub> concentration by wind speed and direction at West Harbour in 2019.

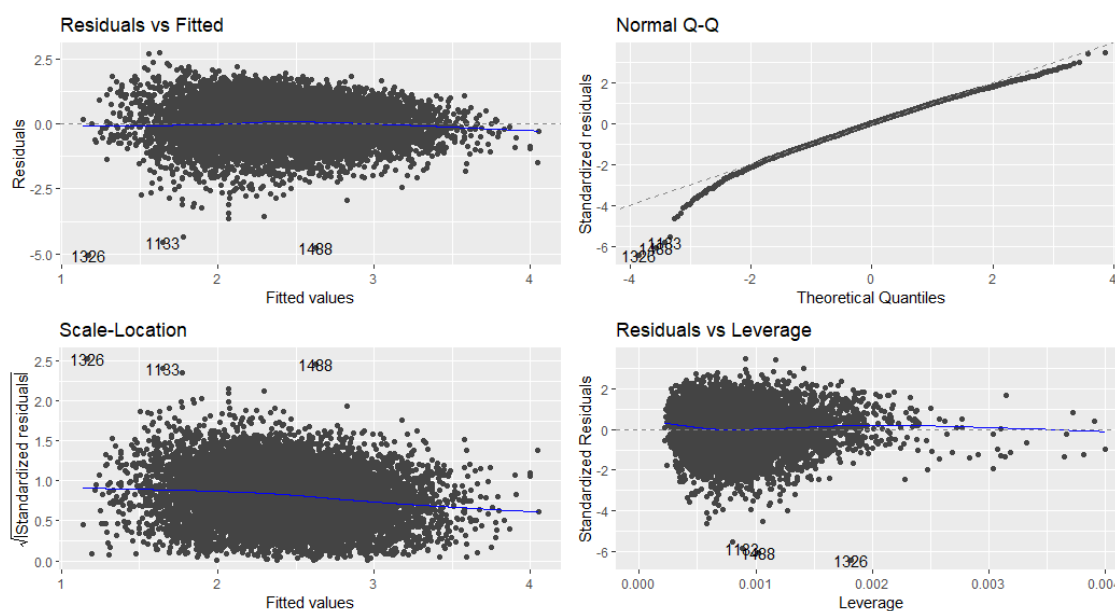

**Figure S19.** Diagnostic plots of the model residuals for departures and log NO<sub>2</sub> at West Harbour in 2019.

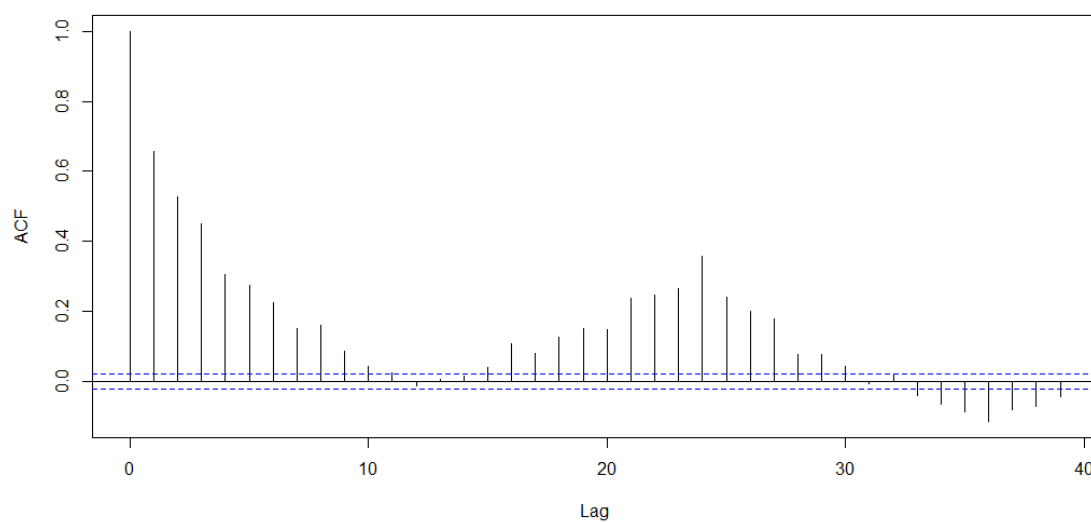

**Figure S20.** Autocorrelation function plot of the model residuals for departures and log NO<sub>2</sub> at West Harbour in 2019.

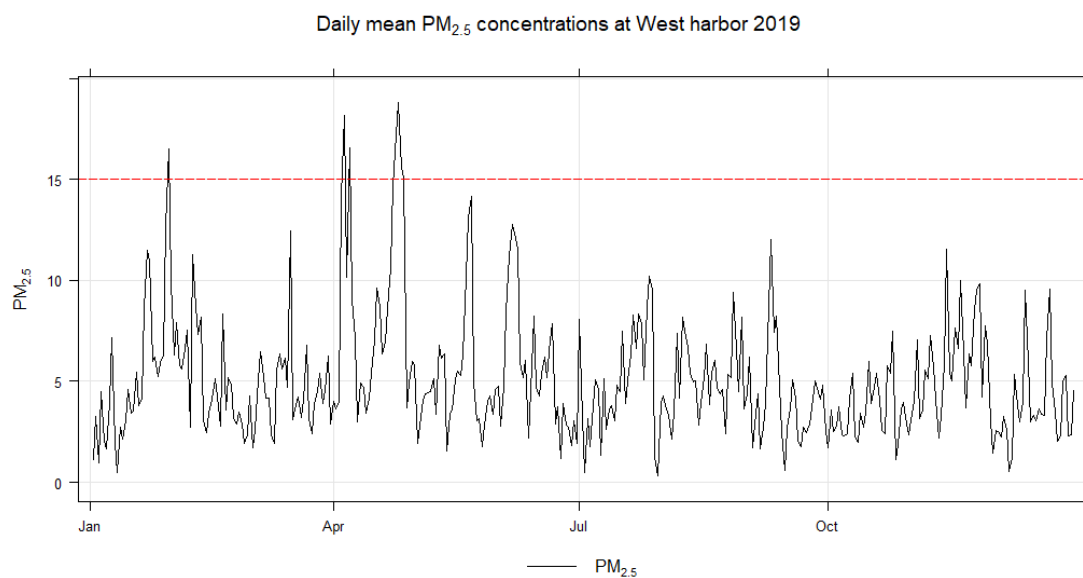

**Figure S21.** Time series plot of daily mean  $PM_{2.5}$  concentration at West Harbour in 2019. Red dashed line is the WHO 2021 guideline value ( $15 \mu\text{g}/\text{m}^3$ ).

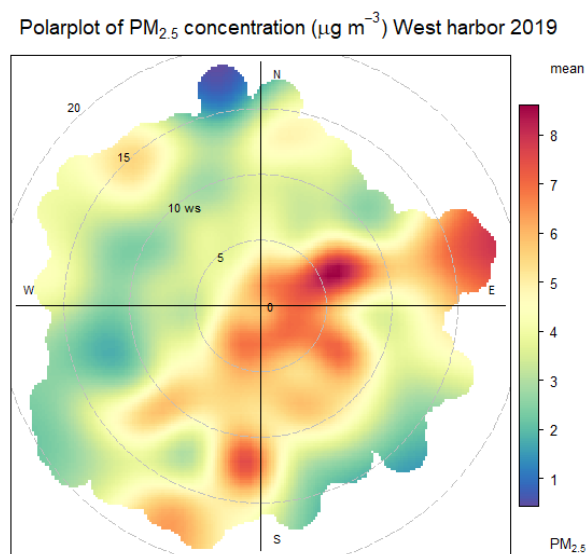

**Figure S22.** Polarplot of  $PM_{2.5}$  concentration by wind speed and direction at West Harbour in 2019.

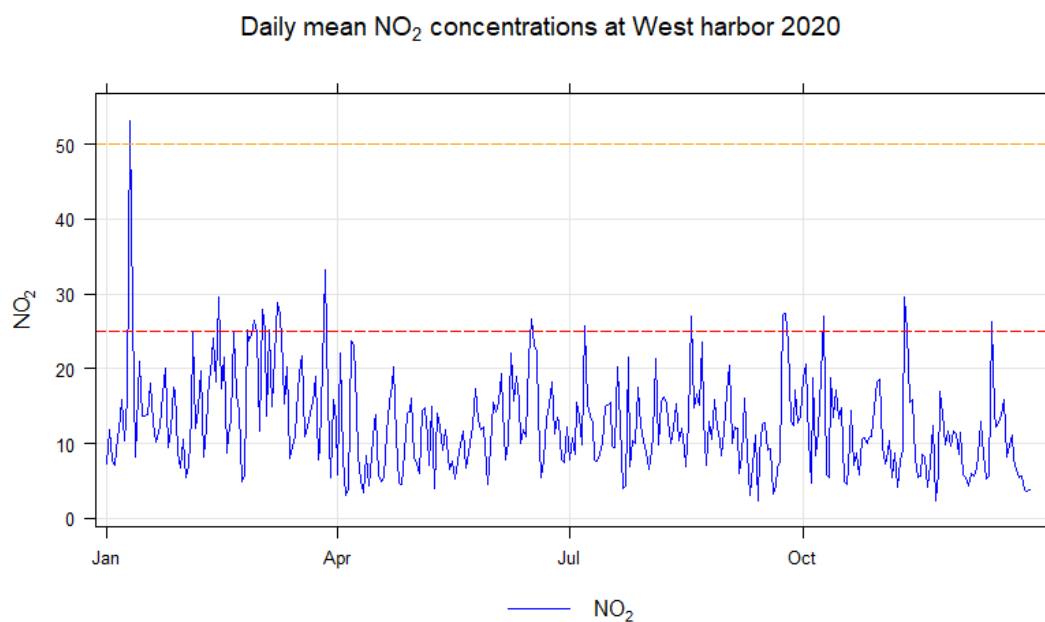

**Figure S23.** Time series plot of daily mean NO<sub>2</sub> at West Harbour in 2020. Red dashed line is the WHO 2021 guideline value (25  $\mu\text{g}/\text{m}^3$ ) and the orange dashed line the European Commission proposal (50  $\mu\text{g}/\text{m}^3$ ).

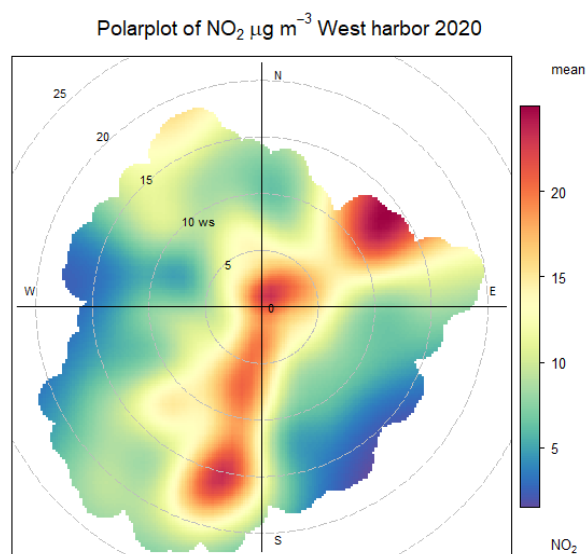

**Figure S24.** Polarplot of NO<sub>2</sub> concentration by wind speed and direction at West Harbour in 2020.

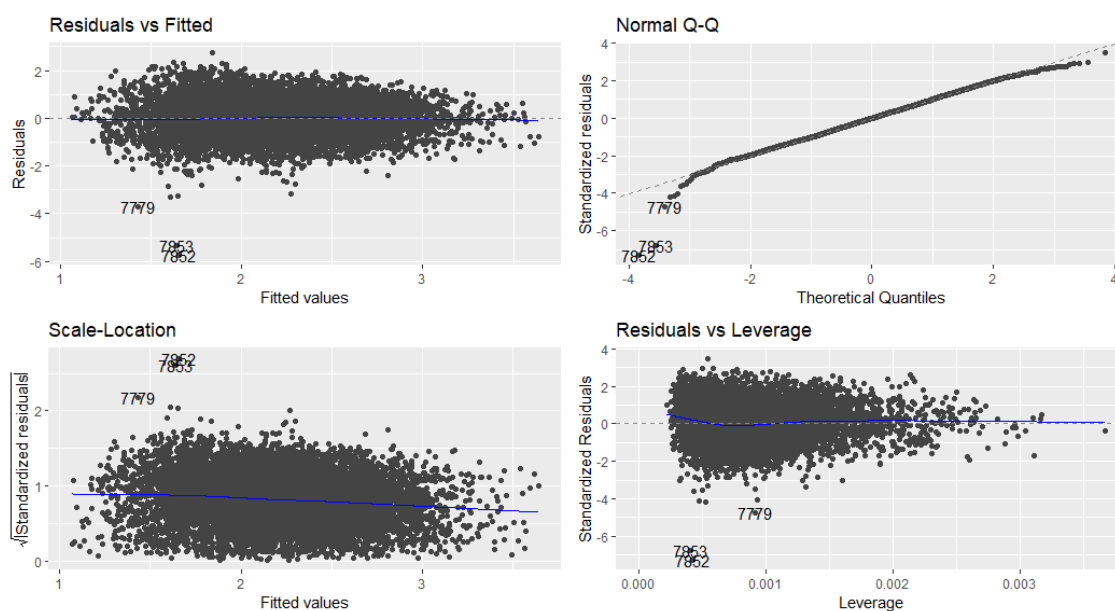

**Figure S25.** Diagnostic plots of the model residuals for departures and log NO<sub>2</sub> at West Harbour in 2020.

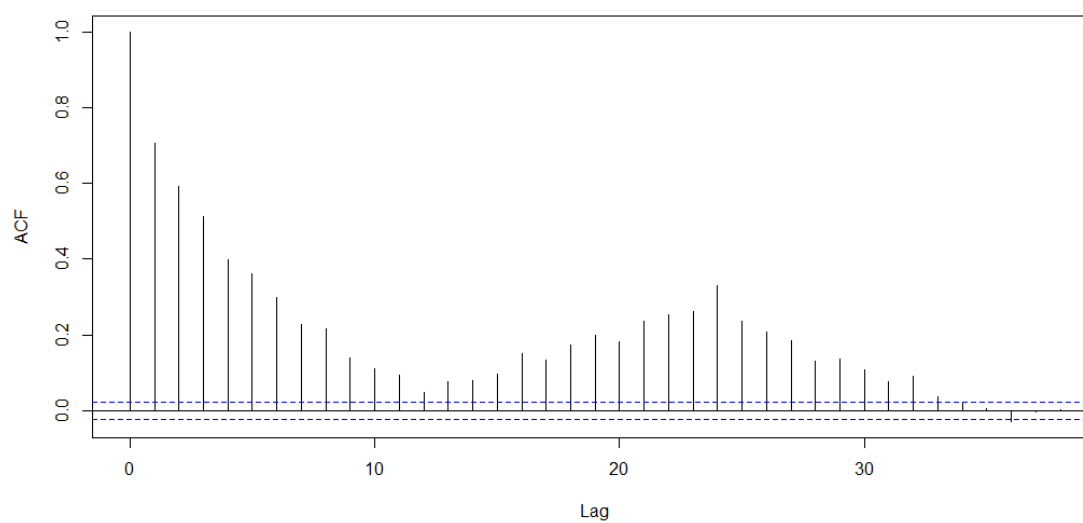

**Figure S26.** Autocorrelation function plot of the model residuals for departures and log NO<sub>2</sub> at West Harbour in 2020.

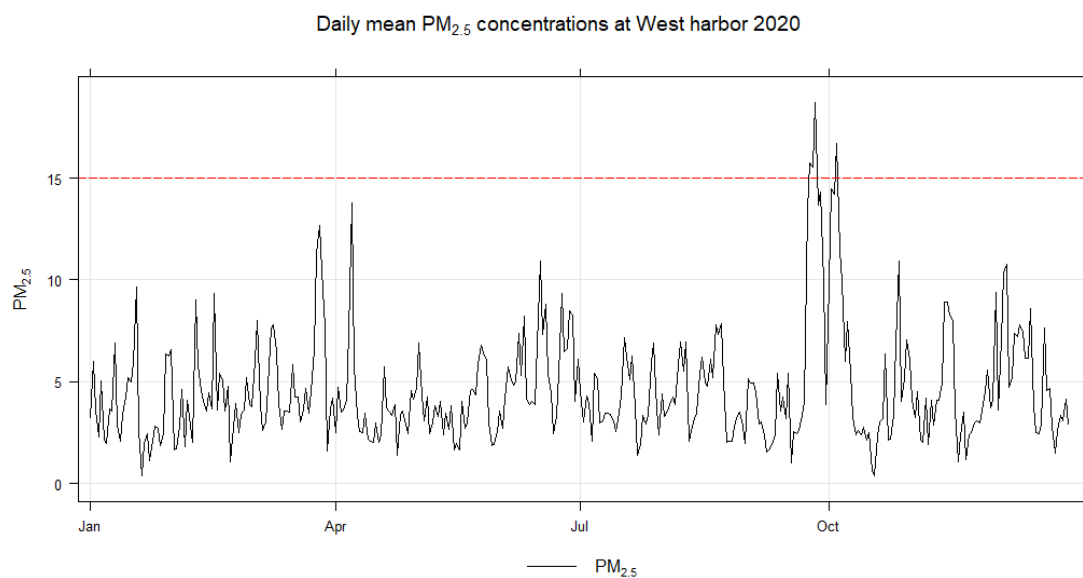

**Figure S27.** Time series plot of daily mean  $PM_{2.5}$  at West Harbour in 2020. Red dashed line is the WHO 2021 guideline value ( $15 \mu\text{g}/\text{m}^3$ ).

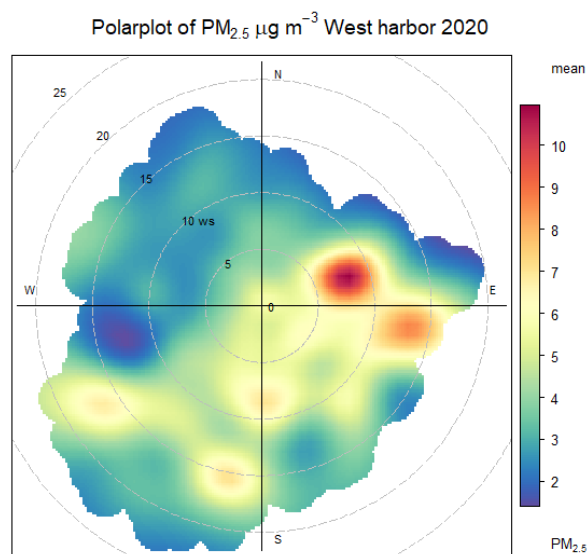

**Figure S28.** Polarplot of  $PM_{2.5}$  concentration by wind direction and speed at West Harbour in 2020.

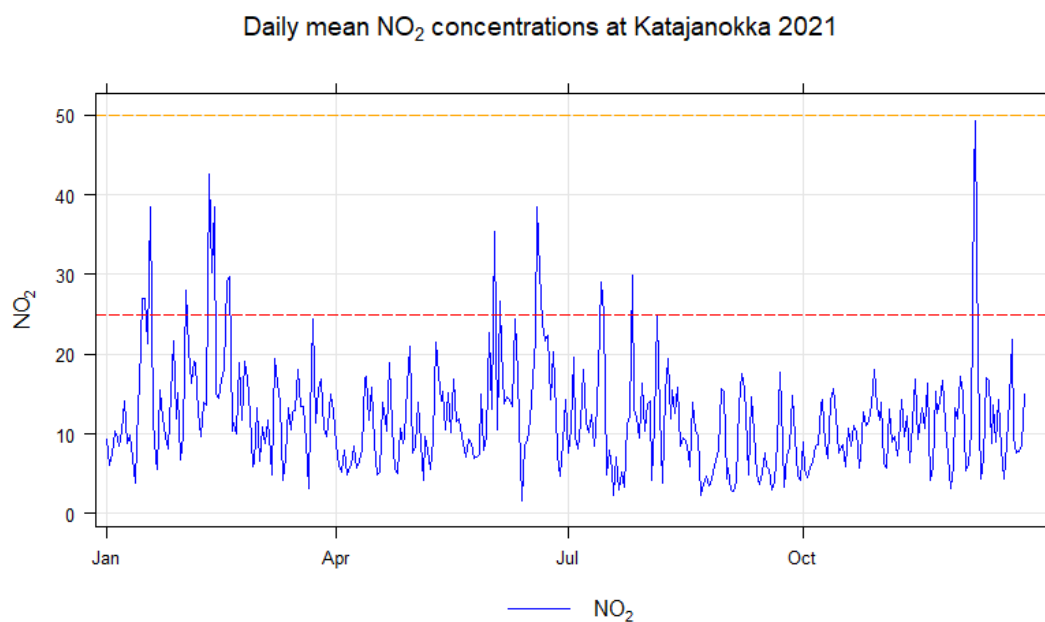

**Figure S29.** Time series plot of daily mean NO<sub>2</sub> at Katajanokka in 2021. Red dashed line is the WHO 2021 guideline value (25 µg/m<sup>3</sup>) and the orange dashed line the European Commission proposal (50 µg/m<sup>3</sup>).

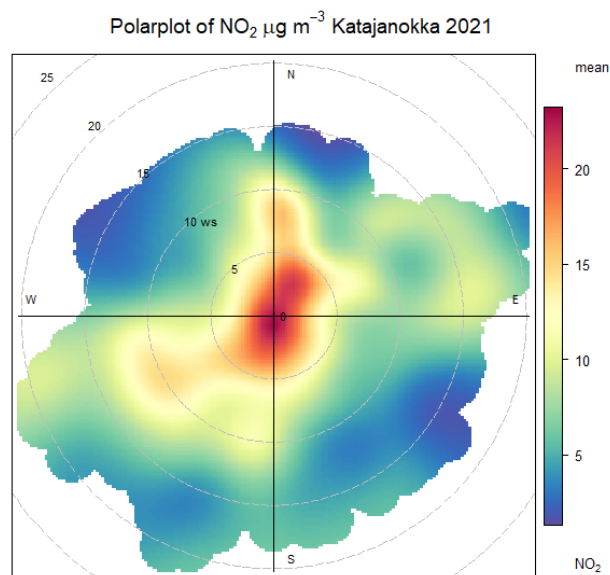

**Figure S30.** Polarplot of NO<sub>2</sub> concentration by wind speed and direction at Katajanokka in 2021.

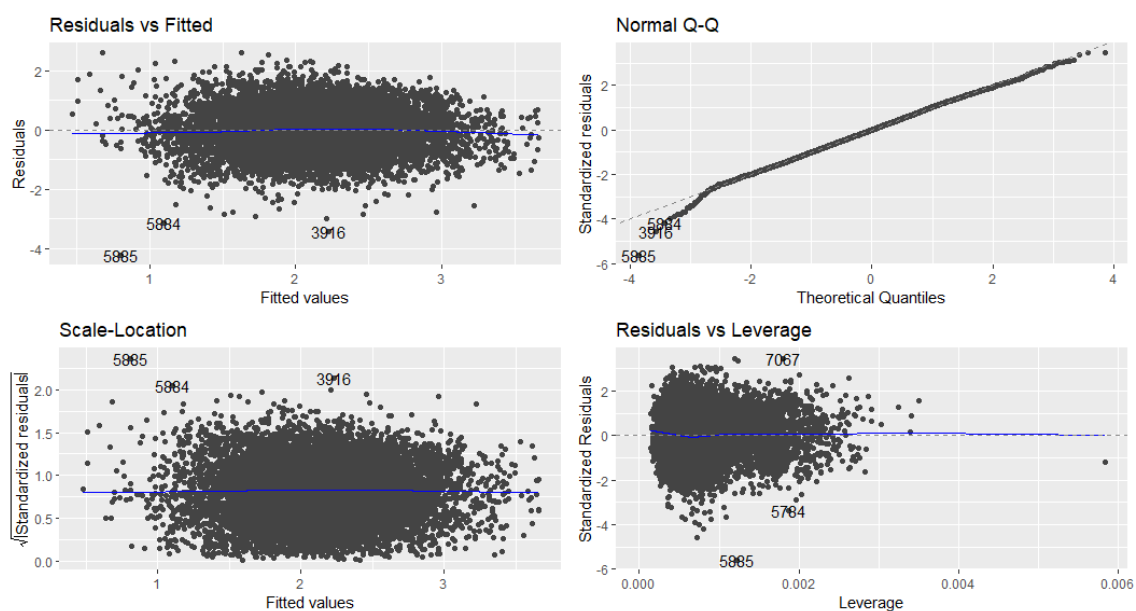

**Figure S31.** Diagnostic plots of the model residuals for closest ferry departures and log NO<sub>2</sub> at Katajanokka in 2021.

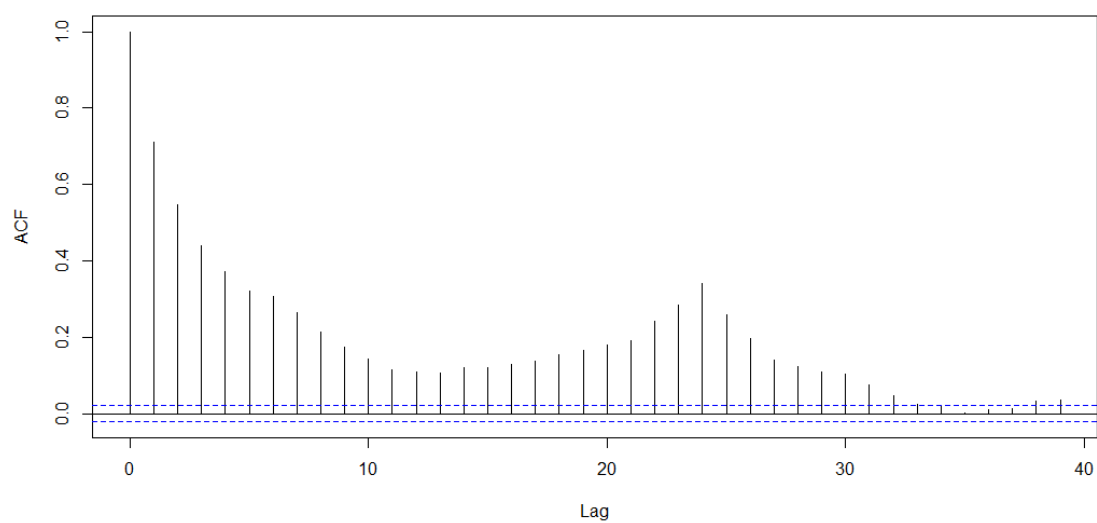

**Figure S32.** Autocorrelation function plot of the model residuals for closest ferry departures and log NO<sub>2</sub> at Katajanokka in 2021.



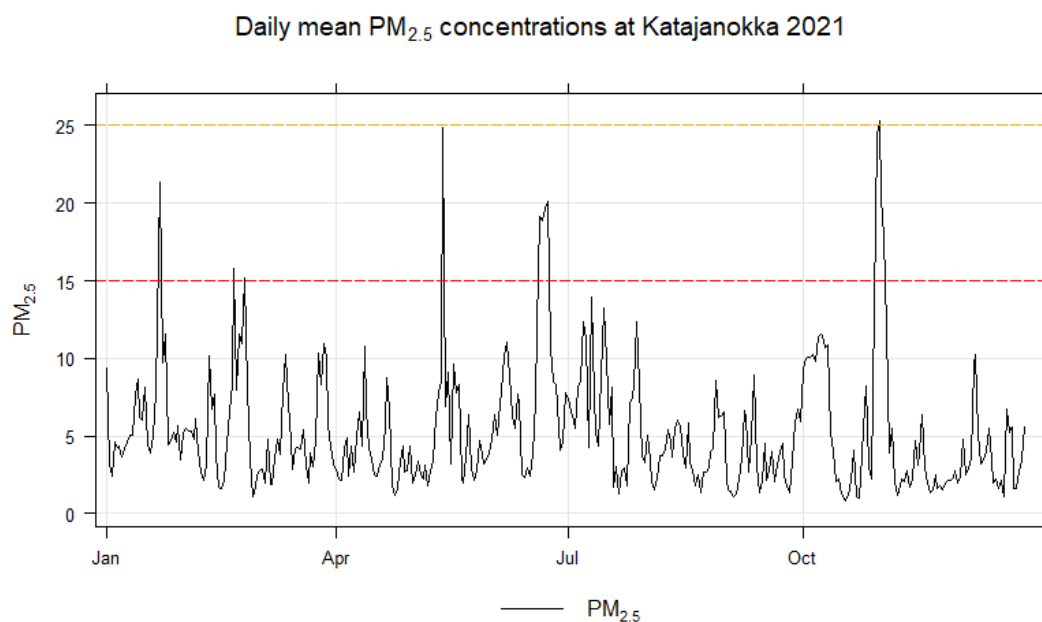

**Figure S33.** Time series plot of daily mean PM<sub>2.5</sub> at Katajanokka in 2021. Red dashed line is the WHO 2021 guideline value (15  $\mu\text{g}/\text{m}^3$ ) and the orange dashed line the European Commission proposal (25  $\mu\text{g}/\text{m}^3$ ).

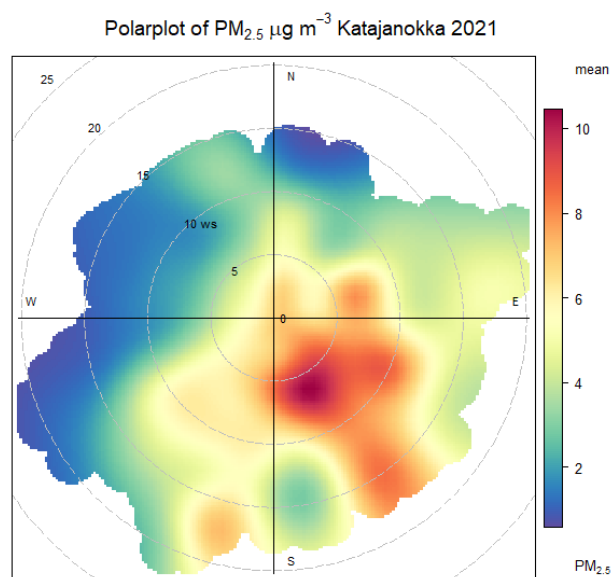

**Figure S34.** Polarplot of PM<sub>2.5</sub> concentration by wind direction and speed at Katajanokka in 2021.
